# Supplementary material for: Thermoresponsive gel embedding extracellular vesicles from adipose stromal cells improves the healing of colonic anastomoses following irradiation in rats
Source: PubMed Central journal article supplement — Commun Biol. 2024 Dec 19;7:1673. doi: 10.1038/s42003-024-07364-2 (PMC11659299; doi:10.1038/s42003-024-07364-2), 2024-12-19

## SUPPLEMENTARY FIGURE LEGENDS

**Figure S1: Expression of EV markers in rat ADSC EVs by nano flow cytometry.** Panels A-F depict representative plots of Alexa Fluor® 647 intensity in relation to side scatter height, showcasing the expression levels of CD81 (a), CD63 (b), CD9 (c), IgG1 isotype control (d), concomitant staining with the three Alexa Fluor® 647-conjugated anti-tetraspanins antibodies (e), and unstained EVs (f). (g) Percentage of positive particles relative to the total number of detected particles for each condition. The results are presented as the mean  $\pm$  standard deviation of 4 biological replicates (with 3 technical replicates for each).

**Figure S2. TEM images of rat ADSC EV.** (a and b) ADSC EVs alone. (c and d) ADSC EVs embedded in PF-127. Scale-bar 500 nm.

Figure S1

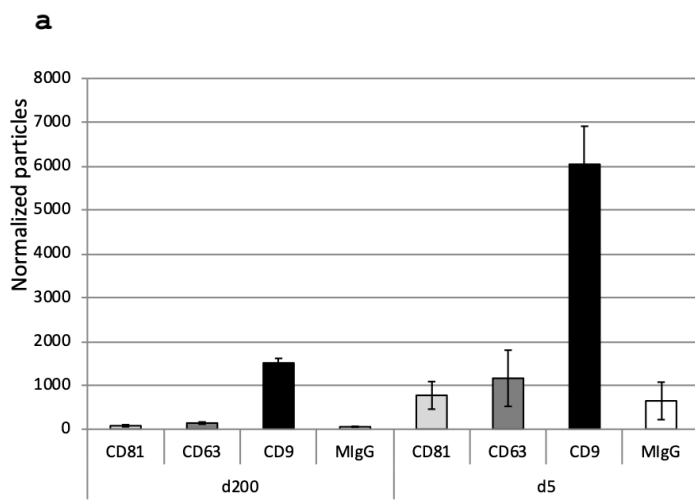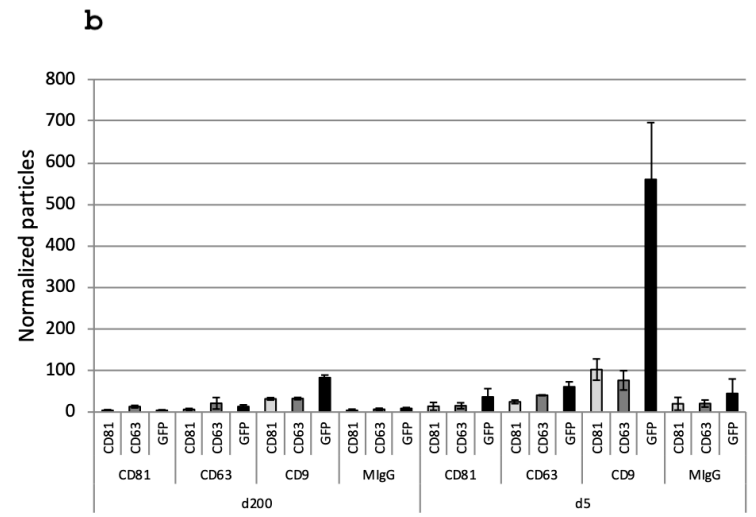

**Figure S2**

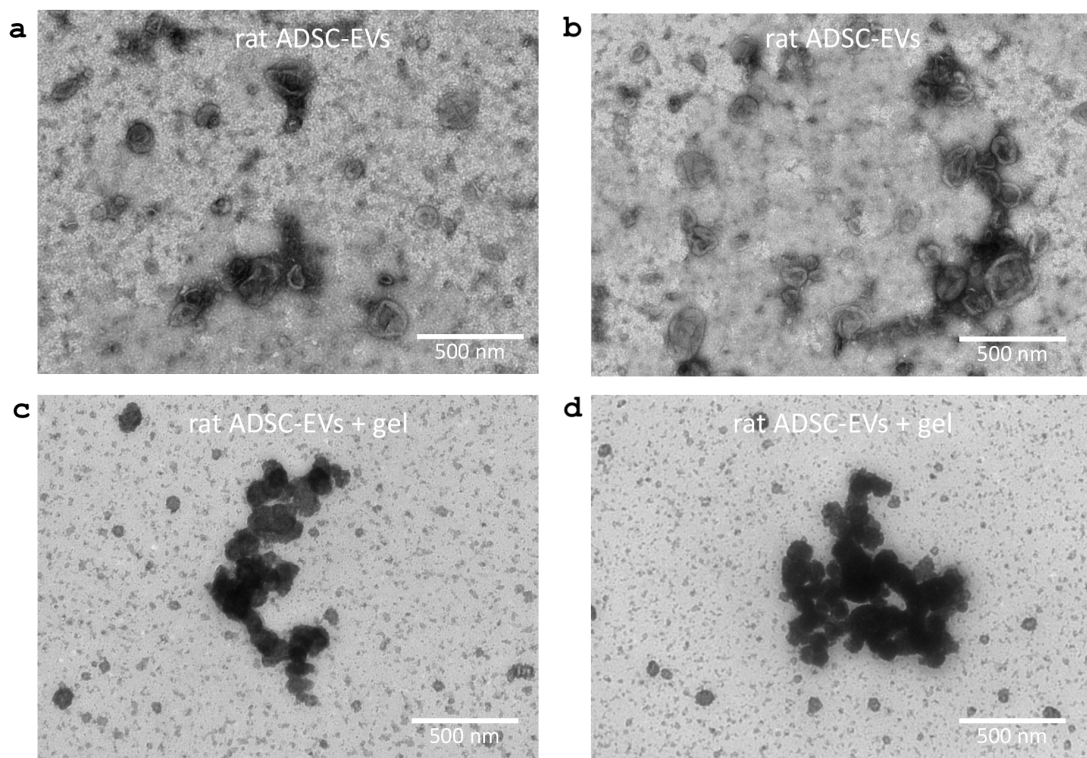

Supplement: 42003_2024_7364_MOESM1_ESM.pdf [file 42003_2024_7364_MOESM1_ESM.pdf]
